# Supplementary material
Source: bioRxiv or medRxiv preprint supplement (http://biorxiv.org/highwire/filestream/98024/field_highwire_adjunct_files/0/319848-1.pdf)
Supplement: Supplementary file [file 319848-1.pdf]

SUPPLEMENTAL MATERIAL

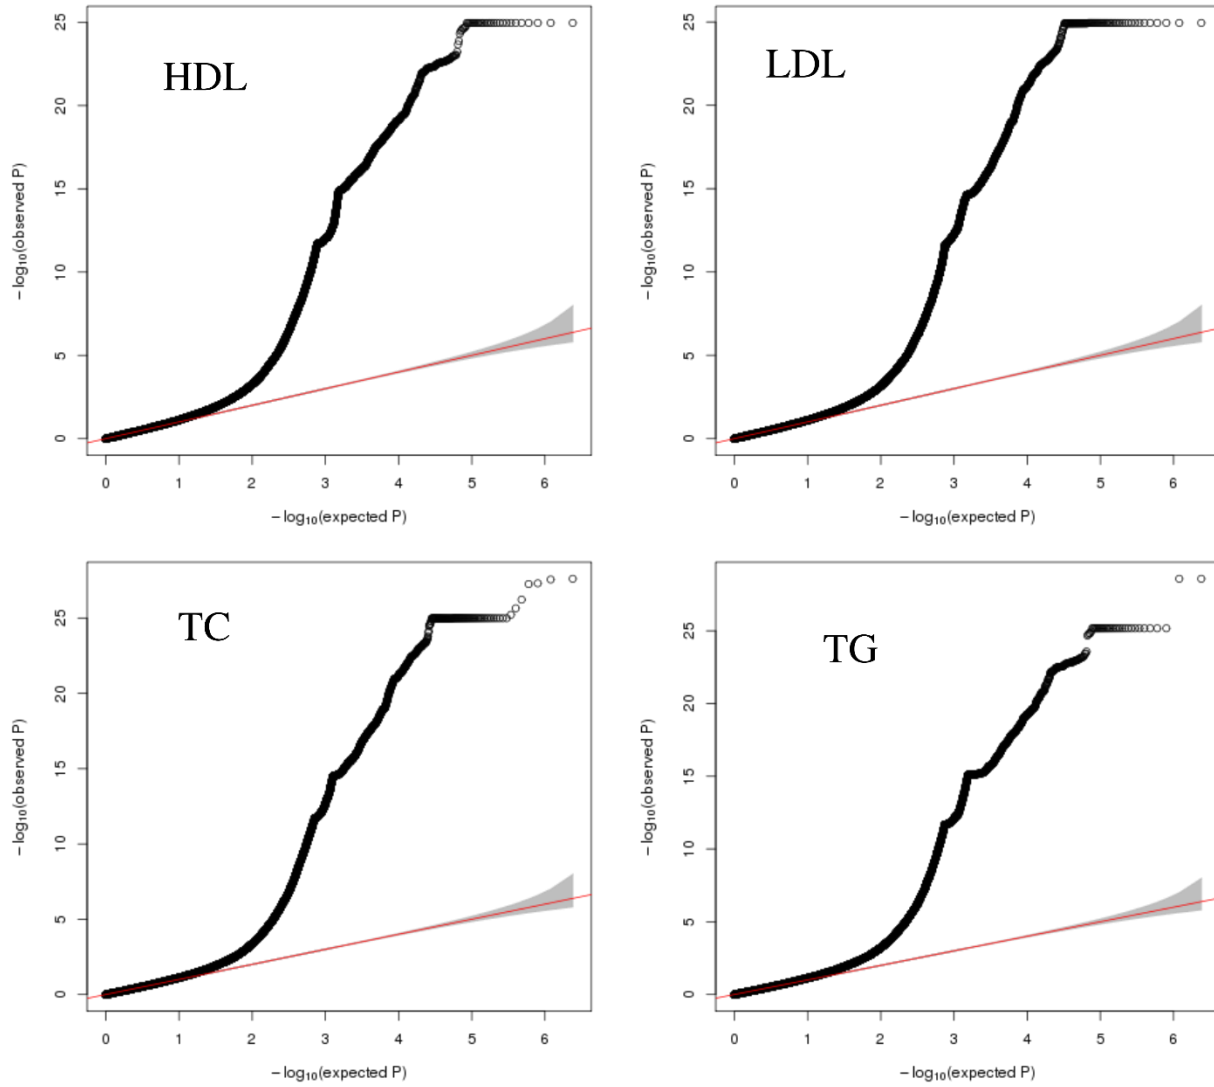

**Supplementary Figure 1:** QQ plots of p-values for each bivariate GWAS scan between Coronary Artery Disease (CAD) and each of four lipid traits (HDL: High-Density Lipoprotein Cholesterol, LDL: Low-Density Lipoprotein cholesterol, TC: Total Cholesterol, TG: Triglycerides).

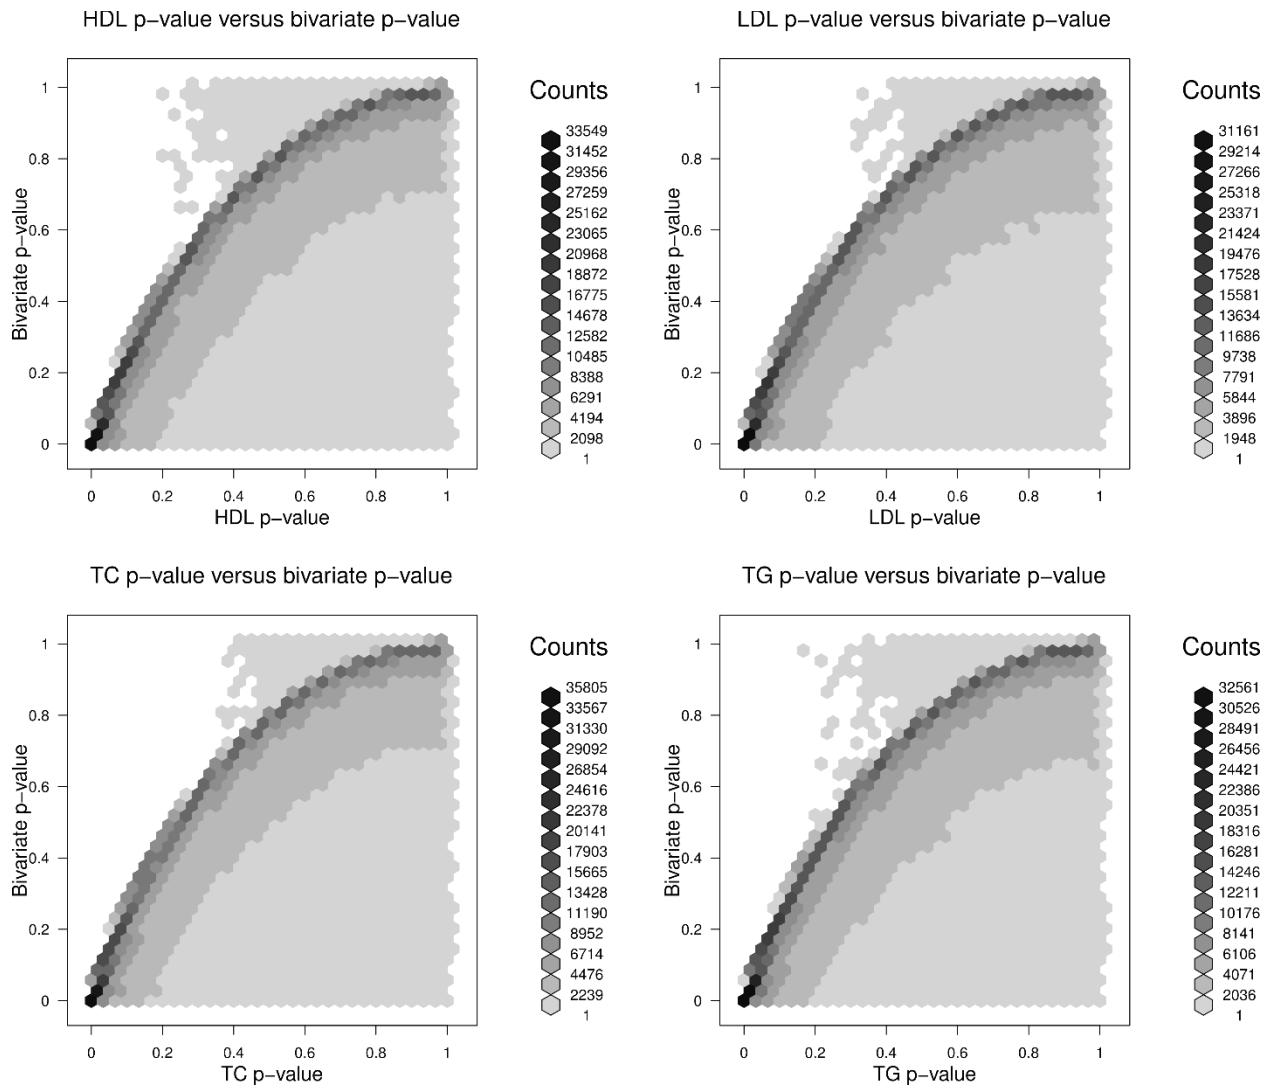

**Supplementary Figure 2:** Hexagonal binning plot between single trait lipid GWAS p-value and p-values from the bivariate GWAS with CAD and each lipid trait. Each hexagon is colored based on the number of genetic variants with P-values within the range represented by that space on the plot.

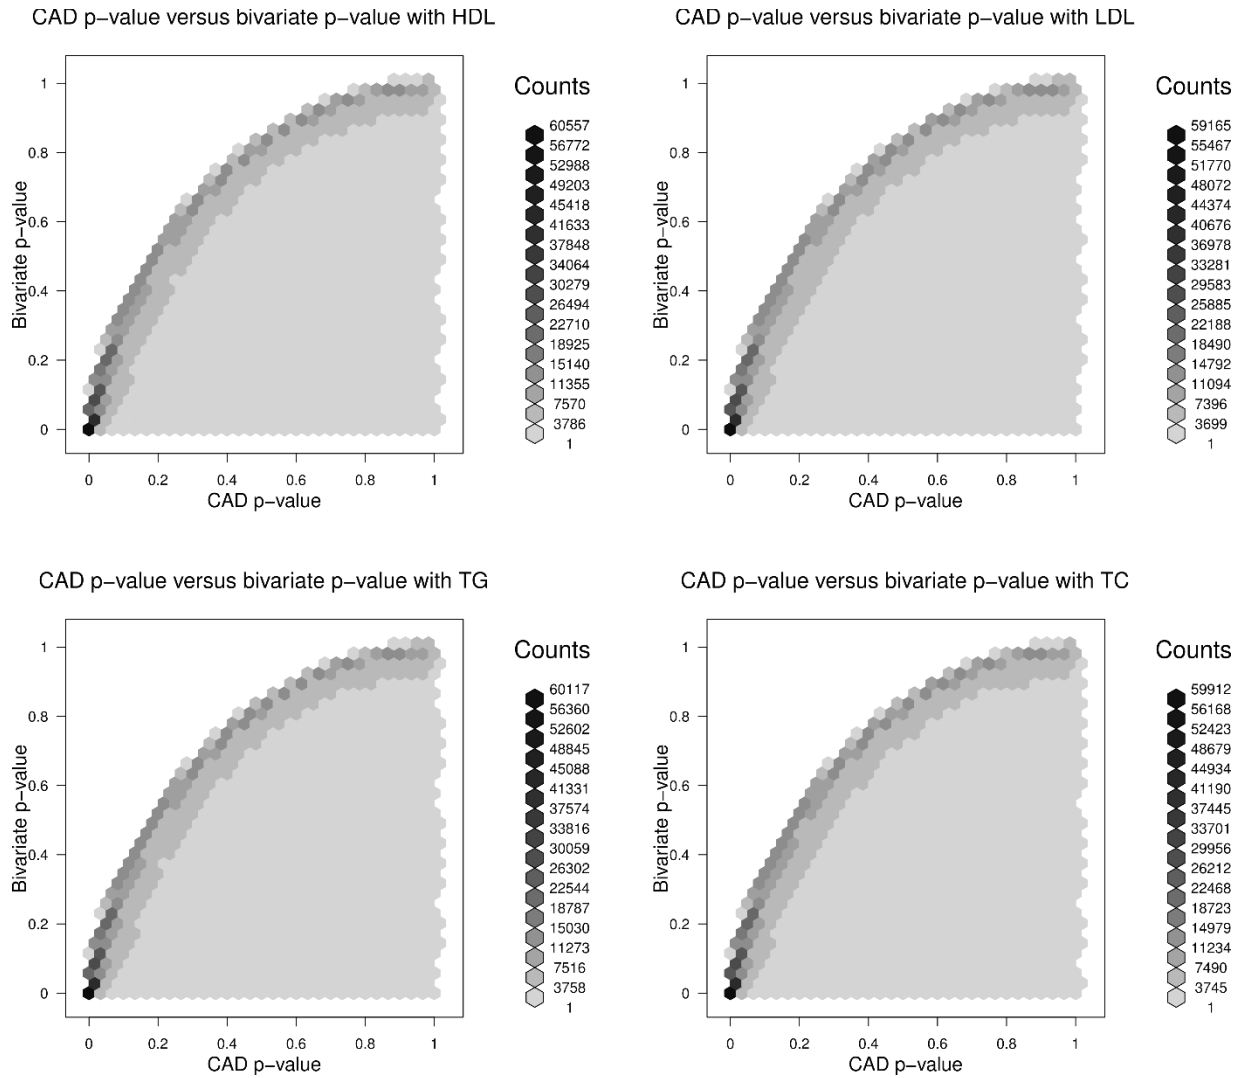

**Supplementary Figure 3:** Hexagonal binning plot between single trait CAD GWAS p-value and P-values from the bivariate GWAS with CAD. Each hexagon is colored based on the number of genetic variants with P-values within the range represented by that space on the plot.

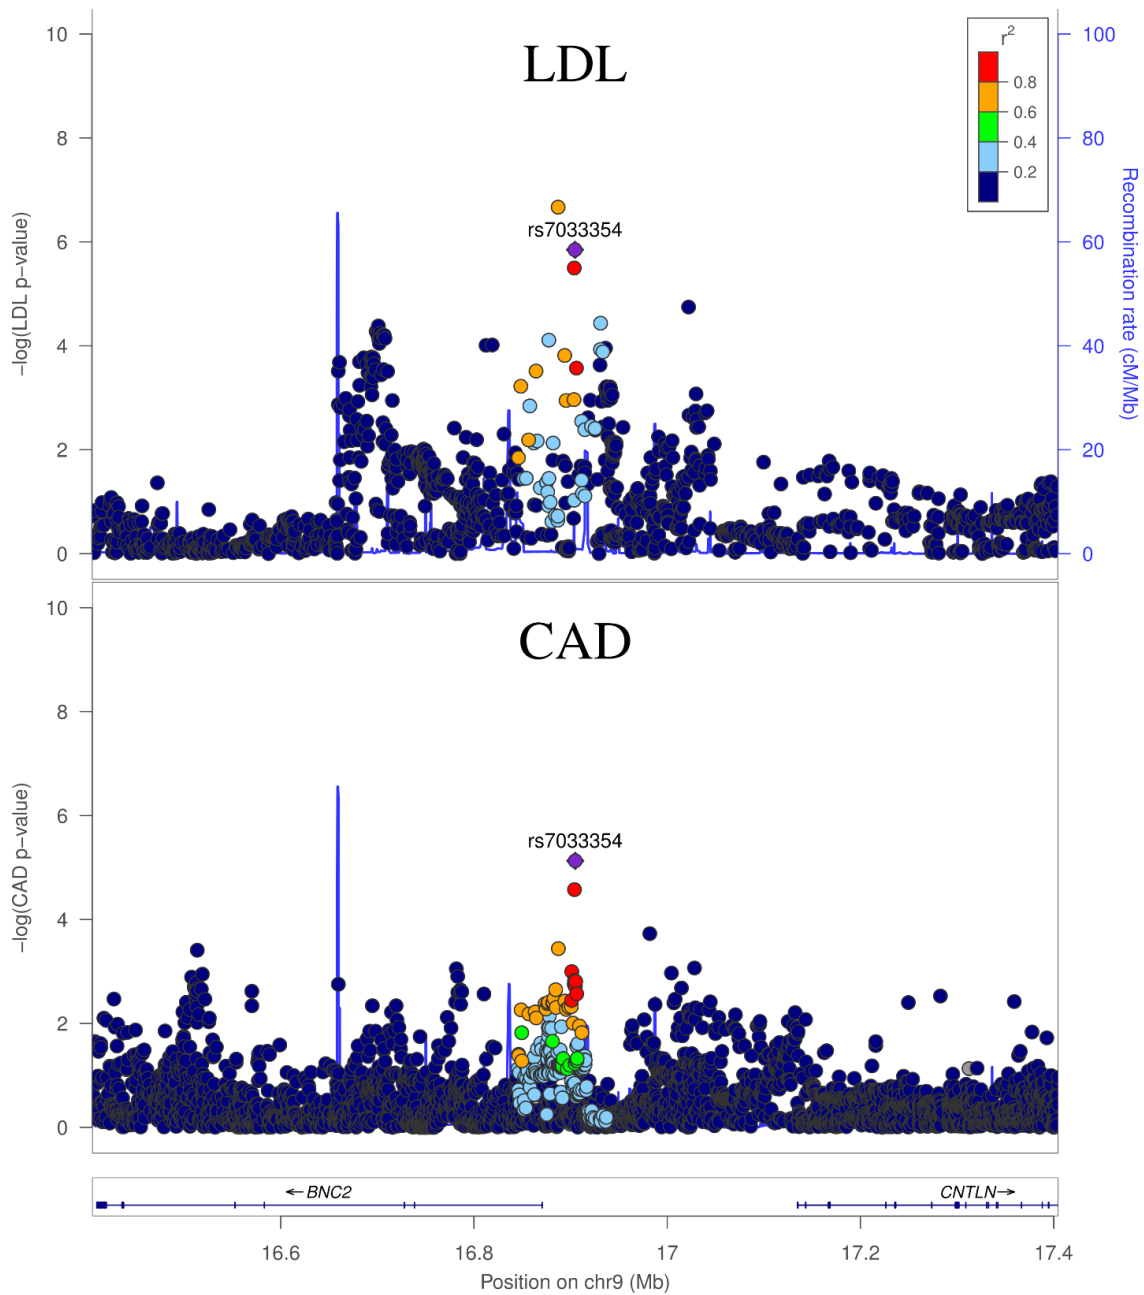

**Supplementary Figure 4:** GWAS signals for LDL cholesterol and Coronary Artery Disease (CAD) upstream of the *BNC2* gene.

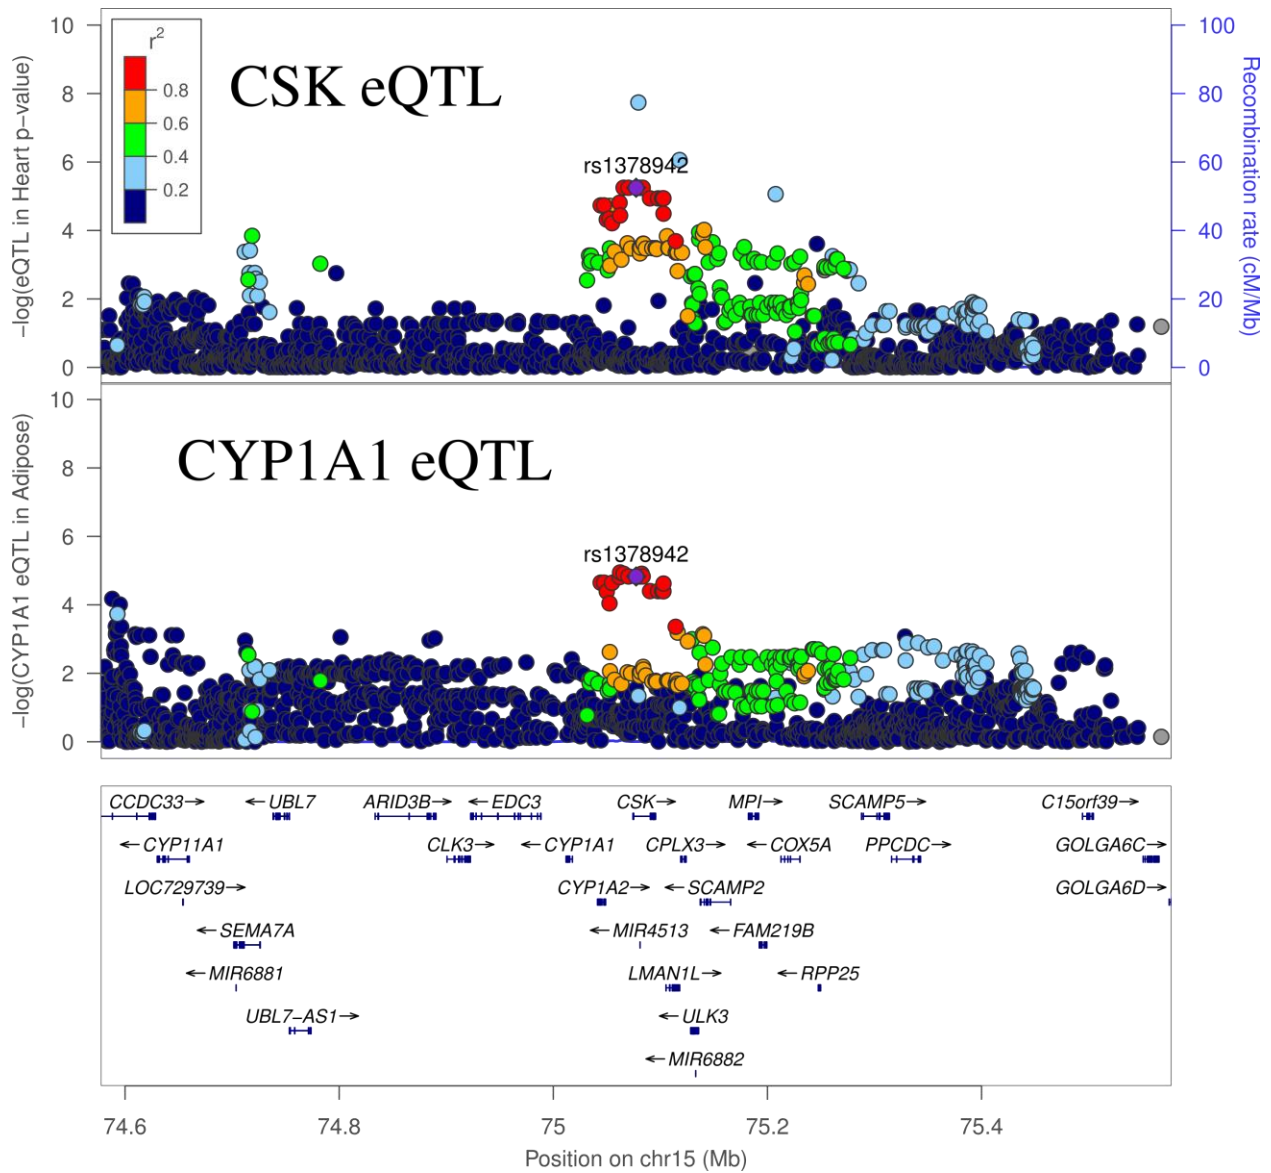

**Supplementary Figure 5:** eQTL signals for the CSK (in the left ventricle of the heart) and CYP1A1 (in adipose subcutaneous) genes around rs1378942, a lead bivariate GWAS hit for total cholesterol and CAD.

|                                 | HDL/CAD | LDL/CAD | TC/CAD  | TG/CAD  |
|---------------------------------|---------|---------|---------|---------|
| Estimate of $\mu$ : $Z_{Lipid}$ | -0.0020 | 0.0054  | 0.0043  | 0.0021  |
| Estimate of $\mu$ : $Z_{CAD}$   | -0.0029 | -0.0021 | -0.0029 | -0.0027 |
| Estimate of $\sigma^2$ : Lipid  | 1.0063  | 1.0192  | 1.0287  | 0.9896  |
| Estimate of $\sigma^2$ : CAD    | 1.2748  | 1.2823  | 1.2756  | 1.2784  |
| Covariance                      | -0.0727 | 0.0629  | 0.0570  | 0.0722  |

Supplementary Table 1: Estimates of bivariate normal parameters for each scan

| Variant    | chr | Position (hg19) | Lipid Trait | PP3  | PP4  |
|------------|-----|-----------------|-------------|------|------|
| rs895953   | 12  | 122249048       | TG          | 0.17 | 0.26 |
| rs895953*  | 12  | 122249048       | TG          | 0.00 | 0.32 |
| rs3741782  | 12  | 109095137       | LDL         | 0.00 | 0.98 |
| rs7033354  | 9   | 16904846        | LDL         | 0.01 | 0.84 |
| rs12423664 | 12  | 133069894       | TG          | 0.02 | 0.53 |
| rs2908290  | 7   | 44216137        | TG          | 0.06 | 0.77 |
| rs2908290* | 7   | 44216137        | TG          | 0.00 | 0.87 |
| rs1378942  | 15  | 75077367        | TC          | 0.14 | 0.44 |

\* denotes 200kb window (100kb on either side of variant), chosen to exclude nearby independent GWAS peaks, instead of default 1MB region

Supplementary Table 2: Colocalization probabilities between CAD and Lipid GWAS signals at each lead SNP (**Methods**). PP3 denotes the posterior probability that both traits are associated in the region, but with different causal variants. PP4 denotes the posterior probability that both traits are associated and share a single causal variant.

| SNP       | Gene | Effect Allele / Other Allele | TG Beta / p-value              | CAD Beta / p-value            | Fasting glucose adj. for BMI Beta / p-value | Glycated Hemoglobin Beta / p-value | Type II Diabetes Beta / p-value |
|-----------|------|------------------------------|--------------------------------|-------------------------------|---------------------------------------------|------------------------------------|---------------------------------|
| rs2908290 | GCK  | A/G                          | 0.017 / $1.5 \times 10^{-6}$   | 0.023 / $1.4 \times 10^{-5}$  | 0.032 / $5.0 \times 10^{-23}$               | 0.014 / $1.1 \times 10^{-19}$      | 0.034 / $3.2 \times 10^{-4}$    |
| rs1260326 | GCKR | C/T                          | -0.11 / $2.3 \times 10^{-239}$ | -0.018 / $1.9 \times 10^{-3}$ | 0.03 / $1.3 \times 10^{-24}$                | 0.0059 / $3.7 \times 10^{-4}$      | 0.049 / $2.3 \times 10^{-6}$    |

Supplementary Table 3: Association between GCK and GCKR alleles and cardiometabolic phenotypes.



| SNP           | Lipid Trait                                | Gene   | Tissue                   | eQTL x CAD PP3       | eQTL x CAD PP4 | eQTL x Lipid PP3     | eQTL x Lipid PP4 |       |       |       |
|---------------|--------------------------------------------|--------|--------------------------|----------------------|----------------|----------------------|------------------|-------|-------|-------|
| rs3741782     | LDL                                        | CORO1C | Adipose Visceral Omentum | 0.066                | 0.717          | 0.022                | 0.942            |       |       |       |
|               |                                            |        | Adrenal Gland            | 0.085                | 0.601          | 0.018                | 0.926            |       |       |       |
|               |                                            | SSH1   | Whole Blood              | 0.097                | 0.586          | 0.068                | 0.823            |       |       |       |
| rs895953      | TG                                         | RHOF   | Adipose Subcutaneous     | 0.402                | 0.057          | 0.009                | 0.990            |       |       |       |
|               |                                            |        | Artery Coronary          | 0.358                | 0.058          | 0.009                | 0.990            |       |       |       |
|               |                                            |        | Artery Tibial            | 0.398                | 0.064          | 0.009                | 0.990            |       |       |       |
|               |                                            | HPD    | Adipose Subcutaneous     | 0.403                | 0.047          | 0.023                | 0.974            |       |       |       |
|               |                                            |        | Muscle Skeletal          | 0.427                | 0.002          | 0.830                | 0.080            |       |       |       |
|               |                                            |        | Whole Blood              | 0.427                | 0.002          | 0.877                | 0.030            |       |       |       |
|               |                                            | BCL7A  | Muscle Skeletal          | 0.424                | 0.010          | 0.903                | 0.001            |       |       |       |
|               |                                            |        | rs895953                 | HDL                  | RHOF           | Adipose Subcutaneous | 0.402            | 0.057 | 0.011 | 0.969 |
|               |                                            |        |                          |                      |                | Artery Coronary      | 0.358            | 0.058 | 0.012 | 0.946 |
| Artery Tibial | 0.398                                      | 0.064  |                          |                      |                | 0.013                | 0.964            |       |       |       |
| HPD           | Adipose Subcutaneous                       | 0.403  |                          |                      | 0.047          | 0.020                | 0.945            |       |       |       |
|               | Muscle Skeletal                            | 0.427  |                          |                      | 0.002          | 0.159                | 0.585            |       |       |       |
|               | Whole Blood                                | 0.427  |                          |                      | 0.002          | 0.354                | 0.078            |       |       |       |
| BCL7A         | Muscle Skeletal                            | 0.424  | 0.010                    | 0.356                | 0.070          |                      |                  |       |       |       |
|               | rs895953<br>(100 kb window on either side) | TG     | RHOF                     | Adipose Subcutaneous | 0.006          | 0.055                | 0.009            | 0.990 |       |       |
|               |                                            |        |                          | Artery Coronary      | 0.005          | 0.055                | 0.012            | 0.979 |       |       |
| Artery Tibial |                                            |        |                          | 0.006                | 0.064          | 0.009                | 0.990            |       |       |       |
| HPD           |                                            |        | Adipose Subcutaneous     | 0.006                | 0.045          | 0.023                | 0.974            |       |       |       |
|               |                                            |        | Muscle Skeletal          | 0.006                | 0.001          | 0.830                | 0.080            |       |       |       |
|               |                                            |        | Whole Blood              | 0.006                | 0.002          | 0.877                | 0.030            |       |       |       |
| BCL7A         |                                            |        | Muscle Skeletal          | 0.006                | 0.005          | 0.901                | 0.002            |       |       |       |
|               |                                            |        | rs12423664               | TG                   | FBRSL1         | Pancreas             | 0.157            | 0.388 | 0.000 | 1.000 |
| Whole Blood   |                                            |        |                          |                      |                | 0.251                | 0.020            | 0.635 | 0.252 |       |
| rs1378942     | TC                                         | CSK    | Adipose Subcutaneous     | 0.121                | 0.625          | 0.039                | 0.914            |       |       |       |
|               |                                            |        | Heart Left Ventricle     | 0.094                | 0.637          | 0.080                | 0.765            |       |       |       |
|               |                                            | CYP1A1 | Adipose Subcutaneous     | 0.127                | 0.431          | 0.059                | 0.786            |       |       |       |
|               |                                            |        | Muscle Skeletal          | 0.193                | 0.441          | 0.090                | 0.821            |       |       |       |

Supplementary Table 4: Colocalization at lead SNPS between eQTL and GWAS signals using the coloc method (**Methods**). Default window was 500kb on either side of the variant of interest.

| Phenotype 1 | Phenotype 2 | PP3  | PP4  |
|-------------|-------------|------|------|
| LDL         | CAD         | 0.07 | 0.11 |
| TC          | CAD         | 0.14 | 0.44 |
| SBP         | CAD         | 0.02 | 0.97 |
| SBP         | LDL         | 0.07 | 0.56 |
| SBP         | TC          | 0.05 | 0.91 |
| LDL         | TC          | 0.03 | 0.66 |

Supplementary Table 5: Evidence of colocalization of GWAS association signals at the CSK variant rs1378942. Performed using the coloc package (**Methods**).
